# How macroecology affects macroevolution: the interplay between extinction intensity and trait-dependent extinction in brachiopods

Peter D. Smits<sup>1,\*</sup>

1. University of California – Berkeley, Berkeley, California 94720;

\* Corresponding author; e-mail: [psmits@berkeley.edu](mailto:psmits@berkeley.edu)

## Abstract

Selection is the force behind differences in fitness, with extinction being the most extreme example of selection. Modern experiments and observations have shown that average fitness and selection strength can vary over time and space. This begs the question: as average fitness increases, does selection strength increase or decrease? The fossil record illustrates how extinction rates have varied through time, with periods of both rapid and slow species turnover. Using Paleozoic brachiopods as a study system, I developed a model to understand how the average taxon duration (i.e. fitness) varies over time, to estimate trait-based differences in taxon durations (i.e. selection), and to measure the amount of correlation between taxon fitness and selection. I find evidence for when extinction intensity increases, selection strength on geographic range also increases. I also find strong evidence for a non-linear relationship between environmental preference for epicontinental versus open-ocean environments and expected taxon duration, where taxa with intermediate preferences are expected to have greater durations than environmental specialists. Finally, I find that taxa which appear more frequently in epicontinental environments will have a greater expected duration than those taxa which prefer open-ocean environments. My analysis supports the conclusions that as extinction intensity increases and average fitness decreases, as happens during a mass extinction, the trait-associated differences in fitness would increase. In contrast, during periods of low extinction intensity when fitness is greater than average, my model predicts that selection associated with geographic range and environmental preference would decrease and be less than average.

21

## Introduction

Selection is the force behind differences in fitness, with the most extreme example of selection being extinction. Modern experiments and paleontological analyses have demonstrated that selection strength and fitness can vary over time and space. An unanswered question in macroevolution is if and how species fitness and selection covary; does the strength of selection change as average fitness also changes? The fossil record demonstrates that extinction risk has varied continuously over time, from periods of low average extinction rate to very high extinction rates (e.g. mass extinctions) (Foote, 2000*a,b*, 2001). Paleontological analyses have also demonstrated trait-based differences in extinction risk among taxa (Jablonski, 2008). Conceptually, extinction is the ultimate manifestation of selection, as we would expect a taxon with a beneficial trait to persist longer than a similar taxon without that trait due to selection (Jablonski, 2008; Rabosky and McCune, 2010; Raup, 1994; Stanley, 1975). Thus, the expected duration of a species can be conceived of as a measure of a species' fitness (Cooper, 1984); meaning that trait-associated differences in species fitness are species selection (Rabosky and McCune, 2010).

In order to test for an association between extinction intensity and extinction selectivity, extinction rate and trait-based differences in extinction rate need to be estimated. Previous work has approached this problem by estimating the extinction intensity and selectivity at different points in time, or for different origination cohorts independently and then comparing those estimates (Payne et al., 2016). I find this approach problematic for a few reasons. Modeling each time point or cohort independently does not use all of the information present in the data, and those estimates are only based on the data from that time point. A hierarchical/mixed-effect modelling approach leverages all data across time points or cohorts by partially pooling information across each of the time-points or cohorts. The resulting parameter estimates have better behaved posteriors (e.g. smaller credible intervals) and limit overly optimistic parameter estimates by weighing those estimates relative to the amount of data associated with each time point or cohort (Gelman et al., 2013). The partial pooling in hierarchical/mixed-effect models also mit-

igates the effects of complete separation, which normally prevents parameter estimates for some  
48 time points or cohorts (Gelman et al., 2013; Payne et al., 2016). Finally, treating each time point  
or cohort as statistically independent means that any and all post-hoc analyses are at risk of false  
positive results due to multiple comparisons issues (Gelman et al., 2013; Gelman and Hill, 2007);  
51 hierarchical/mixed-effect models ameliorate this problem as possible comparisons are modeled  
simultaneously.

Jablonski (1986) observed that for bivalves at the end-Cretaceous mass extinction event,  
54 previous trait-associated differences in survival no longer mattered except in the case of geo-  
graphic range. Based on this evidence, Jablonski (1986) proposed the idea of "macroevolutionary  
regimes:" that mass extinction and background extinction are fundamentally different processes.  
57 However, based on estimates of extinction rates over time, there is no evidence of there being  
two or more "types" of extinction (Wang, 2003). Instead, extinction rates for marine invertebrates  
are unimodal with continuous variation. This disconnect between the qualitative differences of  
60 macroevolutionary modes and the observation of continuous variation in extinction rates im-  
plies the possibility of a relationship between the strength of selection (extinction intensity) and  
the association of traits and differences in fitness (extinction selectivity) (Payne et al., 2016). As  
63 extinction intensity increases, what happens to extinction selectivity? How do trait-associated  
differences in fitness change as average extinction rate changes over time?

Here I develop a statistical model describing the relationship between brachiopod taxon du-  
66 rations and multiple functional taxon traits in order to understand the relationship between ex-  
tinction intensity and selectivity over time. Trait-dependent differences in extinction risk should  
be associated with differences in taxon duration (Cooper, 1984; Rabosky and McCune, 2010). Bra-  
69 chiopods are an ideal group for this study as they have an exceptionally complete fossil record  
(Foote, 2000*b*; Foote and Raup, 1996). I focus on the brachiopod record from the post-Cambrian  
Paleozoic, from the start of the Ordovician, approximately 485 million years ago (Mya), through  
72 the end Permian (approximately 252 Mya) as this represents the time of greatest global brachio-  
pod diversity and abundance (Alroy, 2010).

The analysis of taxon durations, the time from a taxon's origination to its extinction, falls  
75 under the purview of survival analysis, a field of applied statistics commonly used in health-  
care and engineering (Klein and Moeschberger, 2003), that has a long history in paleontology  
(Crampton et al., 2016; Simpson, 1944, 1953; Smits, 2015; Van Valen, 1973, 1979). I adopt a hierar-  
78 chical Bayesian modeling approach (Gelman et al., 2013; Gelman and Hill, 2007) in order to unify  
the previously distinct dynamic and cohort paleontological survival approaches (Baumiller, 1993;  
Crampton et al., 2016; Ezard et al., 2012; Foote, 1988; Raup, 1975, 1978; Simpson, 2006; Van Valen,  
81 1973, 1979).

While estimation of trait-dependent speciation and extinction rates from phylogenies of ex-  
tant taxa has become routine (Fitzjohn, 2010; Goldberg et al., 2011, 2005; Maddison et al., 2007;  
84 Rabosky et al., 2013; Stadler, 2011, 2013; Stadler and Bokma, 2013), there are two major ways  
to estimate trait-dependent extinction: analysis of phylogenies and analysis of the fossil record.  
These two directions, phylogenetic comparative and paleobiological, are complementary and in-  
87 tertwined in the field of macroevolution (Hunt and Rabosky, 2014; Jablonski, 2008; Rabosky and  
McCune, 2010). In the case of extinction, analysis of the fossil record has the distinct advantage  
over phylogenies of only extant taxa because extinction is observable; this means that extinction  
90 rates can be directly estimated (Liow et al., 2010; Quental and Marshall, 2009; Rabosky, 2010). The  
approach used here is thus complementary to the analysis of trait-dependent extinction based  
phylogenetic structure.

### 93 *Factors affecting brachiopod survival*

Conceptually, taxon survival can be considered an aspect of "taxon fitness" (Cooper, 1984; Palmer  
and Feldman, 2012). Traits associated with taxon survival are thus examples of species (or higher-  
96 level) selection, as differences in survival are analogous to differences in fitness. The traits an-  
alyzed here are all examples of emergent and aggregate traits (Jablonski, 2008; Rabosky and  
McCune, 2010). Emergent traits are those which are not measurable at a lower level (e.g. species  
99 are a higher level aggregate of individual organism) such as global geographic range, or fos-

sil sampling rate. Aggregate traits, like body size or environmental preference, represent the average of a shared trait across all members of a lower level.

102 Geographic range is widely considered the most important biological trait for estimating differences in extinction risk at nearly all times, with large geographic range conferring low extinction risk (Finnegan et al., 2012; Harnik et al., 2012; Jablonski, 1986, 1987, 2008; Jablonski and Roy, 2003; Payne and Finnegan, 2007). This relationship is expected even if extinction is a completely random process. Because of its importance and size, geographic range was analyzed as a covariate of extinction risk with the initial assumption that a taxon with greater than average 105 geographic range would have a lower than average extinction risk. The effect size of geographic range on extinction acts as a baseline for comparing the strength of selection associated with the other covariates. 108

111 Epicontinental seas are a shallow-marine environment where the ocean has spread over the continental interior or craton with a depth typically less than 100 meters. In contrast, open-ocean coastline environments have much greater variance in depth, do not cover the continental craton, and can persist during periods of low sea level (Miller and Foote, 2009). This hypothesis 114 is that taxa which favor epicontinental seas would be at a greater extinction risk during periods of low sea levels, such as during glacial periods, than environmental generalists or open-ocean specialists. Epicontinental seas were widely spread globally during the Paleozoic (approximately 117 541-252 Mya) but declined over the Mesozoic (approximately 252-66 My) and have nearly disappeared during the Cenozoic (approximately 66-0 My) as open-ocean coastlines became the dominant shallow-marine setting (Johnson, 1974; Miller and Foote, 2009; Peters, 2008; Sheehan, 2001). Taxa in epicontinental environments could also have a greater extinction susceptibility than taxa in open-ocean environments during anoxic events or other major changes to water 120 chemistry due to limited water circulation from the open-ocean into epicontinental seas (Peters, 2007). Similarly, if there is a major and sudden change to water chemistry in a single epicontinental sea, the sluggish water flow into and out of that sea would most likely not affect other 123 epicontinental seas leading to local extirpation but not global extinction. 126

Miller and Foote (2009) demonstrated that, during several mass extinctions, taxa associated with open-ocean environments tended to have a greater extinction risk than those taxa associated with epicontinental seas. During periods of background extinction, however, they found no consistent difference in extinction risk between taxa favoring either environment. Miller and Foote (2009) hypothesize that open-ocean taxa may have a greater extinction rate because these environments would be more strongly affected by poisoning of the environment from impact fallout or volcanic events because water circulates at a higher rate and in greater volume in open-ocean environments compared to the relatively more sluggish circulation in epicontinental environments. These two environment types represent the primary identifiable environmental dichotomy observed in ancient marine systems (Miller and Foote, 2009; Sheehan, 2001). Given these findings, I would hypothesize that as average extinction risk increases, the difference in risk associated with open-ocean environments versus epicontinental environments should generally increase.

Because environmental preference is defined here as the continuum between occurring exclusively in open-ocean environments versus epicontinental environments, intermediate values are considered “generalists” in the sense that they favor neither end-member. A long-standing hypothesis is that generalists or unspecialized taxa will have greater survival than specialists (Baumiller, 1993; Liow, 2004, 2007; Nürnberg and Aberhan, 2013, 2015; Simpson, 1944; Smits, 2015). Because of this, the effect of environmental preference was modeled as a quadratic function, where a concave-down relationship between preference and expected duration indicates that generalists are favored over specialists end-members. Importantly, this approach does not “force” a non-linear relationship and only allows one if the second-order term is non-zero.

Body size, measured as shell length, is also considered as a trait that may potentially influence extinction risk (Harnik, 2011; Payne et al., 2014). Body size is a proxy for metabolic activity and other correlated life history traits (Payne et al., 2014). Harnik et al. (2014) analyzed the effect of body size selectivity in Devonian brachiopods in both phylogenetic and non-phylogenetic contexts and found that that body size was not associated with differences in taxonomic duration.

However, there are some bivalve subclades for which body size can be as important a factor as geographic range size in determining extinction risk (Harnik, 2011). Given these results, I expect that if body size has any effect on brachiopod taxonomic survival, it will be very small.

It is well known that, given the incompleteness of the fossil record, the observed duration of a taxon is an underestimate of that taxon's true duration (Alroy, 2014; Foote and Raup, 1996; Liow and Nichols, 2010; Solow and Smith, 1997; Wagner and Marcot, 2013; Wang and Marshall, 2004). Because of this, the concern is that a taxon's observed duration may reflect its relative chance of being sampled and not any of the effects of the covariates of interest. In this case, for sampling to be a confounding factor there must be consistent relationship between the quality of sampling of a taxon and its apparent duration (e.g. greater sampling, longer duration). If there is no relationship between sampling and duration then interpretation can be made clearly; while observed durations are obviously truncated true durations, a lack of a relationship would indicate that the amount and form of this truncation is not a major determinant of the taxon's apparent duration. By including sampling as a covariate in the model, this effect can be quantified and can be taken into account when interpreting the estimates of the effects of the other covariates.

## Methods

The brachiopod dataset analyzed here was sourced from the Paleobiology Database (<http://www.paleodb.org>) which was limited to Brachiopods as defined by the higher taxonomic groups Rhynchonelliformea: Rhynchonellata, Chileata, Obolellida, Kutorginida, Strophomenida, and Spiriferida. Additionally, samples were limited to those which originated after the Cambrian but before the Triassic. Temporal, stratigraphic, and other relevant occurrence information used in this analysis was also downloaded from the same source. Analyzed occurrences were restricted to those with paleolatitude and paleolongitude coordinates, being assigned to either epicontinental or open-ocean environment, and belonging to a genus present in the body size dataset (Payne et al., 2014). Epicontinental versus open-ocean assignments for each fossil occurrence are based on those from



previous analyses (Foote and Miller, 2013; Miller and Foote, 2009; Ritterbush and Foote, 2017).

180 These filtering criteria are very similar to those from Foote and Miller (2013) with the additional constraint to only those taxa which occur in the body size data set from Payne et al. (2014). In total, 1130 genera were included in this analysis.

183 Fossil occurrences were analyzed at the genus level, a common practice for paleobiological, macroevolutionary, and macroecological studies, and this is especially the case for marine invertebrates (Alroy, 2010; Eronen et al., 2011; Foote and Miller, 2013; Harnik et al., 2012; Kiessling and  
186 Aberhan, 2007; Miller and Foote, 2009; Nürnberg and Aberhan, 2013, 2015; Payne and Finnegan, 2007; Ritterbush and Foote, 2017; Simpson and Harnik, 2009; Vilhena et al., 2013). While species diversity dynamics are frequently of much greater interest than those of higher taxa (though  
189 see Foote 2014; Hoehn et al. 2015), the nature of the fossil record makes accurate, precise, and consistent taxonomic assignments at the species level difficult for all occurrences. To ensure a minimum level of confidence and accuracy in the data, I analyzed genera as opposed to species.  
192 Additionally, when species and genera can be compared, they often yield similar results (Foote et al., 2007; Jernvall and Fortelius, 2002; Roy D. & Valentine, I. W., 1996). Importantly, it is also possible that genera represent coherent biological units as there is evidence for congruence be-  
195 tween morphologically and genetically defined genera of molluscs and mammals (Jablonski and Finarelli, 2009).

Genus duration was calculated as the number of geologic stages from first appearance to  
198 last appearance, inclusive. Durations were based on geologic stages as opposed to millions of years because of the inherently discrete nature of the fossil record. Dates are not assigned to individual fossils themselves; rather fossils are assigned to a geological interval which represents  
201 some temporal range. In this analysis, stages are effectively irreducible temporal intervals in which taxa may occur. Genera with their last occurrence in or after Changhsingian stage (e.g. the final stage of the study interval) were right-censored. Censoring in this context indicates that  
204 the genus was observed up to a certain age, but that its ultimate time of extinction is unknown (Klein and Moeschberger, 2003).

The covariates of duration included in this analysis are geographic range size ( $r$ ), environ-  
207 mental preference ( $v, v^2$ ), shell length ( $m$ ), and sampling ( $s$ ).

The geographic range of a genus was calculated as the number of occupied grid cells from  
a gridded map of all contemporaneous occurrences. First, the paleolatitude-paleolongitude co-  
210 ordinates for all occurrences were projected onto an equal-area cylindrical map projection. Each  
occurrence was then assigned to one of the cells from a  $70 \times 34$  regular raster grid placed on the  
map. Each grid cell represents approximately 250,000 km<sup>2</sup>. The map projection and regular lattice  
213 were made using shape files from <http://www.natureearthdata.com/> and the raster package  
for R (Hijmans, 2015). For each time interval a taxon's geographic range is calculated from the  
ratio of cells occupied by that taxon divided by the total number of cells with any occurrences.  
216 For each taxon in each temporal bin, the relative occurrence probability of the observed taxa was  
calculated using the JADE method developed by Chao et al. (2015) which leverages the distribu-  
tion of taxon occurrences to estimate their "true" geographic range. This method accounts for the  
219 fact that taxa with an occupancy of 0 cannot be observed, which means that occupancy follows  
a truncated Binomial distribution. This correction is critical when comparing occupancies from  
different times with different geographic sampling. After occurrence probability is calculated for  
222 all taxa for each temporal bin in which they occur, I calculated mean occurrence probability of  
each taxa. This final value is my proxy for the geographic range of a taxon.

Environmental preference is a descriptor of whether and by how much a taxon prefers epi-  
225 continental to open-ocean environments. This approach presents environmental preference as a  
continuum from exclusive occurrence at the ends and equal occurrences in the middle. My mea-  
sure of environmental preference is derived from the number of epicontinental or open-ocean ob-  
228 servations of a taxon compared to the total number of epicontinental or open-ocean observations  
that also occurred during time intervals shared with that taxon. Mathematically, environmental  
preference was defined as probability of observing the ratio of epicontinental occurrences to total  
231 occurrences ( $\theta_i = e_i/E_i$ ) or greater given the background occurrence probability  $\theta'_i$  as estimated  
from all other taxa occurring at the same time ( $e'_i/E'_i$ ). This measure of environmental preference

is expressed

$$\begin{aligned} p(\theta'_i | e'_i, E'_i) &\propto \text{Beta}(e'_i, E'_i - e'_i) \text{Beta}(1, 1) \\ &= \text{Beta}(e'_i + 1, E'_i - e'_i + 1), \end{aligned} \tag{1}$$

234 where  $v$  is the percent of the distribution defined in equation 1 as less than or equal to  $\theta_j$ . The Beta distribution is used here because it is a continuous distribution bounded at 0 and 1, which is idea for modeling percentages.

237 Body size, measured as shell length, was sourced directly from Payne et al. (2014). These measurements were made from brachiopod taxa figured in the *Treatise on Invertebrate Paleontology* (Williams et al., 2007).

240 The sampling probability for individual taxa, called  $s$ , was calculated using the standard gap statistic (Foote, 2000a; Foote and Raup, 1996). The gap statistic is calculated as the number of stages in which the taxon was sampled exempting its first and last stages. Because taxa that  
243 were right-censored only have a first appearance, one was subtracted from the numerator and denominator instead of two. The inclusion of genus-specific sampling probability as a covariate are an attempt to mitigate the effects of the incompleteness of the fossil record on our ability  
246 to observe genus duration. The implications of this choice are discussed further later in the Discussion.

The minimum duration for which a gap statistic can be calculated is three stages, so I chose  
249 the impute the gap statistic for all observations with a duration of less than 3. Imputation is the “filling in” of missing observations based on the observed values (Gelman and Hill, 2007; Rubin, 1996).

252 Prior to analysis, geographic range was logit transformed and the number of samples was natural-log transformed; these transformations make these variables defined for the entire real line. Sampling probability was transformed as  $(s(n - 1) + 0.5)/n$  where  $n$  is the sample size as  
255 recommended by Smithson and Verkuilen (2006); this transformation shrinks the range of the data so that there are no values equal to 0 or 1. All covariates except for sampling were standardized by subtracting the mean from all values and dividing by twice its standard deviation,

258 which follows Gelman and Hill (2007). This standardization means that the associated regression  
coefficients are interpretable as the expected change per 1-unit change in the rescaled covariates.  
Finally,  $D$  is defined as the total number of covariates, excluding sampling, plus one for the  
261 intercept term.

### *Details of model*

Hierarchical modelling is a statistical approach which explicitly takes into account the structure  
264 of the observed data (Gelman et al., 2013; Gelman and Hill, 2007). The units of study (e.g. genera)  
each belong to a single group (e.g. origination cohort). Each group is considered a realization of  
a shared probability distribution (e.g. prior) of all cohorts, observed and unobserved. The group-  
267 level parameters, or the hyperparameters of this shared prior, are themselves given (hyper)prior  
distributions and are also estimated like the other parameters of interest (e.g. covariate effects)  
(Gelman et al., 2013). The subsequent estimates are partially pooled together, where parameters  
270 from groups with large samples or effects remain large while those of groups with small samples  
or effects are pulled towards the overall group mean. All covariate effects (regression coefficients),  
as well as the intercept term (baseline extinction risk), were allowed to vary by group (origination  
273 cohort). The covariance between covariate effects was also modeled.

Genus durations were assumed to follow a Weibull distribution, which allows for age-dependent  
extinction (Klein and Moeschberger, 2003):  $y \sim \text{Weibull}(\alpha, \sigma)$ . The Weibull distribution has two  
276 parameters: scale  $\sigma$  and shape  $\alpha$ . When  $\alpha = 1$ ,  $\sigma$  is equal to the expected duration of any taxon.  
 $\alpha$  is a measure of the effect of age on extinction risk, where values greater than 1 indicate that  
extinction risk increases with age, and values less than 1 indicate that extinction risk decreases  
279 with age. Note that the Weibull distribution is equivalent to the exponential distribution when  
 $\alpha = 1$ .

Data censoring and truncation are conditions where the value of interest (taxon duration)  
282 is only partially observed. There are a number of processes which can lead to either of these  
conditions: limited resolution, which leads to left-censoring or truncation; end of study interval,

which leads to right censoring; and incomplete sampling, which can left-censor (short-lived taxa  
285 are less likely to be preserved at all) or right-censor (durations are truncated). In the case of  
the right- and left-censored observations mentioned above, the probability of those observations  
has a different calculation (Klein and Moeschberger, 2003). For right-censored observations, the  
288 likelihood is calculated  $p(y|\theta) = 1 - F(y) = S(y)$ , where  $F(y)$  is the cumulative distribution  
function. Taxa that existed for only a single stage were left-censored, which implies that that  
taxon went extinct at any point between 0 and 1 stages. In contrast to right-censored data,  
291 the likelihood of a left-censored observation is calculated from  $p(y|\theta) = F(y)$ . This censoring  
strategy improves model fit, as measured by WAIC and LOOIC, than treating these taxa as being  
fully observed.

294 The scale parameter  $\sigma$  was modeled as a regression following Kleinbaum and Klein (2005)  
with varying intercept, varying slopes, and the effect of sampling. This model is expressed

$$\sigma_i = \exp\left(\frac{-\mathbf{X}_i B_{j[i]} + \delta s_i}{\alpha}\right) \quad (2)$$

where  $i$  indexes across all observations from  $i = 1, \dots, n$ ,  $n$  is the total number of observations,  
297  $j[i]$  is the cohort membership of the  $i$ th observation for  $j = 1, \dots, J$ ,  $J$  is the total number of  
cohorts,  $X$  is a  $N \times D$  matrix of covariates along with a column of ones for the intercept term,  $B$   
is a  $J \times D$  matrix of cohort-specific regression coefficients, and  $\delta$  is the regression coefficient for  
300 the effect of sampling  $s$ .  $\delta$  does not vary by cohort.

Each of the rows of matrix  $B$  are modeled as realizations from a multivariate normal distri-  
bution with length  $D$  location vector  $\mu$  and  $J \times J$  covariance matrix  $\Sigma$ :  $B_j \sim \text{MVN}(\mu, \Sigma)$ . The  
303 covariance matrix was then decomposed into a length  $J$  vector of scales  $\tau$  and a  $J \times J$  correlation  
matrix  $\Omega$ , defined  $\Sigma = \text{diag}(\tau)\Omega\text{diag}(\tau)$  where “diag” indicates a diagonal matrix.

The elements of  $\mu$  were given independent normally distributed priors. The effects of geo-  
306 graphic range size and the breadth of environmental preference were given informative priors  
reflecting the previous findings while the other parameters were given weakly informative priors  
which favor those covariates having no effect on duration. The correlation matrix  $\Omega$  was given

309 an LKJ distributed prior (Lewandowski et al., 2009) that slightly favors an identity matrix as recommended by Team (2017). These priors are defined

$$\begin{aligned}\mu^0 &\sim \mathcal{N}(0, 5) \\ \mu^r &\sim \mathcal{N}(-1, 1) \\ \mu^v &\sim \mathcal{N}(0, 1) \\ \mu^{v^2} &\sim \mathcal{N}(1, 1) \\ \mu^m &\sim \mathcal{N}(0, 0.5) \\ \delta &\sim \mathcal{N}(1) \\ \tau &\sim \mathcal{C}^+(1) \\ \Omega &\sim \text{LKJ}(2).\end{aligned}\tag{3}$$

The log of the shape parameter  $\alpha$  was given a weakly informative prior  $\log(\alpha) \sim \mathcal{N}(0, 1)$  centered at  $\alpha = 1$ , which corresponds to the Law of Constant Extinction (Van Valen, 1973).

### *Imputation of sampling probability*

The vector sampling  $s$  has two parts: the observed part  $s^o$  and the unobserved part  $s^u$ . Of the 1130 total observations, 539 have a duration of 3 or more and have an observed gap statistic. The gap statistic for the remaining 591 observations was imputed. As stated above, the unobserved part is then imputed, or filled in, based on the observed part  $s^o$ . Because sampling varies between 0 and 1, I chose to model it as a Beta regression with matrix  $W$  being a  $N \times (D - 3)$  matrix of covariates (i.e. geographic range size, environmental preference, body size; no interactions). Predicting sampling probability using the other covariates that are then included in the model of duration is acceptable and appropriate in the case of imputation where the sample goal is accurate prediction (Gelman and Hill, 2007; Rubin, 1996). Not including these covariates can lead to biased estimates of the imputed variable; if the covariates themselves are related, not including them will bias this correlation towards zero which then leads to improper imputation and inference (Rubin, 1996).

The Beta regression is defined

$$s^o \sim \text{Beta}(\phi = \text{logit}^{-1}(X^o \gamma), \lambda), \quad (4)$$

327 where  $\gamma$  is a length  $D$  vector of regression coefficients and  $X$  is defined as above. The Beta distribution used in the regression is reparameterized in terms of a mean parameter

$$\phi = \frac{\alpha}{\alpha + \beta} \quad (5)$$

and total count parameter

$$\lambda = \alpha + \beta \quad (6)$$

330 where  $\alpha$  and  $\beta$  are the characteristic parameters of the Beta distribution (Gelman et al., 2013).

The next step is to estimate  $s^u | s^o, X^o, X^u, \gamma$  which is used as a covariate of taxon duration (Eq. 2). All the elements of  $\gamma$ ,  $\delta$  (Eq. 2), and  $\lambda$  (Eq. 4) were given weakly informative priors as

333 recommended by Team (2017):

$$\begin{aligned} \gamma &\sim \mathcal{N}(0, 1) \\ \delta &\sim \mathcal{N}(0, 1) \\ \lambda &\sim \text{Pareto}(0.1, 1.5). \end{aligned} \quad (7)$$

The imputed values are estimated simultaneously and in the same manner as all other parameters; this ensures that all uncertainty surrounding these unobservable covariate values is  
336 propagated through to all estimates.

### *Posterior inference and posterior predictive checks*

The joint posterior was approximated using a Markov-chain Monte Carlo routine that is a variant of Hamiltonian Monte Carlo called the No-U-Turn Sampler (Hoffman and Gelman, 2014) as  
339 implemented in the probabilistic programming language Stan (Stan Development Team, 2014). The posterior distribution was approximated from four parallel chains run for 40,000 steps, split  
342 half warm-up and half sampling and thinned to every 20th sample for a total of 4000 posterior samples. Starting conditions for sampling were left at the CmdStan defaults for interface except

for the following changes: adapt delta was set 0.95 to ensure no divergent samples, and initial  
345 value was set to 0 which allows for stable initial samples. Posterior convergence was assessed  
using both standard MCMC and HMC specific diagnostics: scale reduction factor  $\hat{R}$ , effective  
sample size or ESS, energy (target  $> 0.2$ ), presence and number of divergent samples, and num-  
348 ber of samples that saturated the maximum trajectory length. For further explanation of these  
diagnostic criteria, see the Stan Manual (Team, 2017).

After the model was fitted to the data, 100 datasets were simulated from the posterior predic-  
351 tive distribution of the model. These simulations were used to test for adequacy of model fit as  
described below.

Survival analysis is complicated by censored observations, where the ultimate time of extinc-  
354 tion for some taxa could not be fully observed during the study window. Posterior predictive  
simulations for these observations must be similarly censored. To accomplish this, posterior  
predictive simulated durations for right-censored observations where the minimum of its final  
357 observed duration and the simulated duration. For left-censored individuals, their simulated  
duration was set to a minimum of one stage.

Model adequacy was evaluated using a series of posterior predictive checks. Posterior pre-  
360 dictive checks are a means for understanding model fit or adequacy. Model adequacy means  
that if our model is an adequate descriptor of the data, then data simulated from the posterior  
predictive distribution should be similar to the observed given the same covariates, etc. (Gel-  
363 man et al., 2013). Posterior predictive checks generally compare some property of the empirical  
data to that property estimated from each of the simulated datasets. Additionally, for structured  
datasets like the one analyzed here, the fit of the model to different parts of the data can be  
366 assessed, which in turn can reveal a great deal if the model has good fit to some aspects of data  
but not others; this is when when knowledge of the biological, geological, or paleoenvironmental  
context of the data becomes important in order to explain what unmodeled processes might lead  
369 to these discrepancies between our data and the model (Gelman et al., 2013).

The types of posterior predictive tests used in this analysis fall into two categories: compari-



son of observed mean and median genus duration to a distribution of mean and median genus  
372 duration estimates from the posterior simulations; and comparison of a non-parametric estimate  
of the survival function from the observed data to estimates of that same survival function from  
the simulations. These posterior predictive tests were done for the entire dataset as a whole and  
375 for each of the origination cohorts individually.

The survival function describes the probability of a taxon persisting given that it has survived  
up to time  $t$ ; this is expressed  $P(T \geq t)$  because  $T$  is the true extinction time of the species and  $t$  is  
378 some arbitrary time of observation and we are estimating that probability that  $t$  is less than  $T$ . It  
is important to note, however, that the survival function does not reflect density of observations  
unlike e.g. histograms. Instead, this posterior predictive check reflects the model's ability to  
381 predict genus survival.

All code necessary to reproduce this analysis are available through an archived Zenodo repos-  
itory DOI <https://zenodo.org/record/1402252>. Additionally, this project is hosted at <https://github.com/psmit>

## 384 **Results**

I first present the results of the multiple posterior predictive checks for the whole dataset as well  
as each of the origination cohorts. I next present the parameter posterior estimates and their  
387 interpretations.

Comparisons between the observed distribution of durations to the distributions of 100 sim-  
ulated datasets reveals the relatively good but heterogeneous fit of the model to the data (Fig. 1).  
390 The two major aspects of possible misfit that are observable are at durations of 2-3 stages. The  
model slightly under-estimates the number of observations with duration of 2 or 3 stages. The  
goal of this model is estimating the expected duration of a genus given its covariate information.  
393 While the model estimates are not exact, it is possible that our model fits the bulk of our data  
well but fits poorly towards the extreme values.

The similarity of the empirical data and from 100 simulated datasets provides a more nuanced

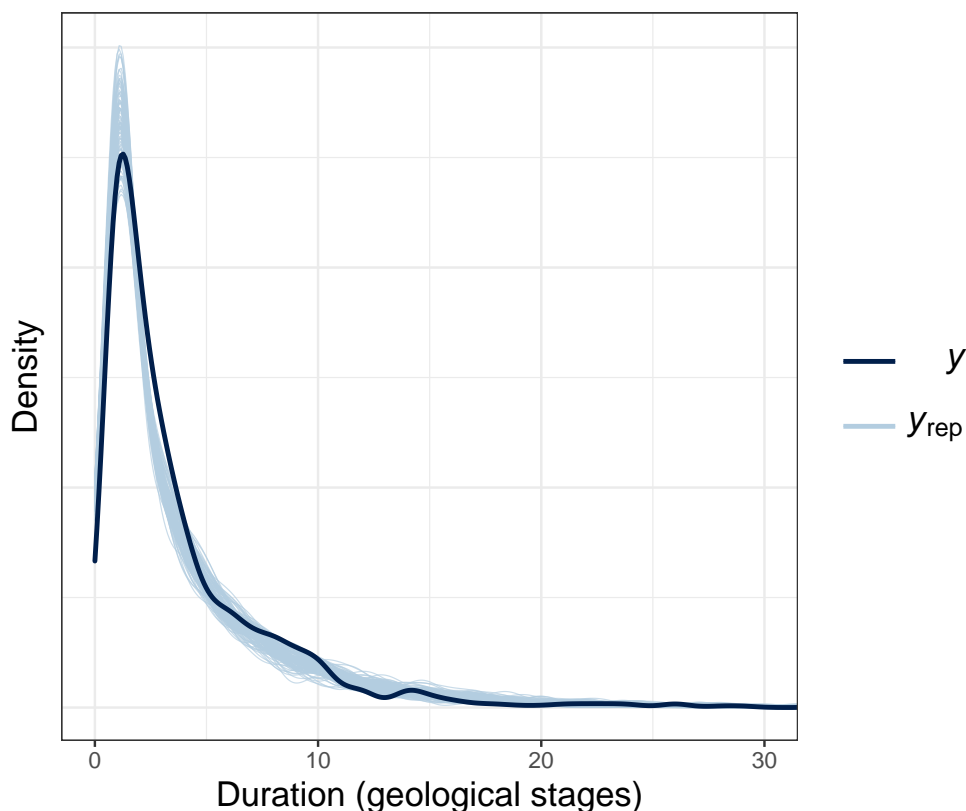

Figure 1: Comparison of the distribution of the observed data (black) to 100 simulated distributions (blue). This is a close-up view of the bulk of the distribution which shows the more subtle aspects of (mis)fit between the data and the model.

396 picture of model adequacy (Fig. 2). The survival curves of the 100 simulated datasets are very  
similar to the survival function estimated from the empirical data. The major points of misfit  
between the model and the data are taxa with duration 1 stage, and taxa with a duration at least  
399 10-13 stages. The major divergence between the observed and the estimated applies to taxa with  
a less than 15% probability of continuing to survive.

Model adequacy at the total data level was assessed through comparison of the mean and  
402 median of the observed data to those from simulated data sets. While the previous posterior  
predictive checks have focused on the relatively good but heterogeneous fit of the model to  
the entire distribution of the data, the fitted model's ability to predict the mean and median

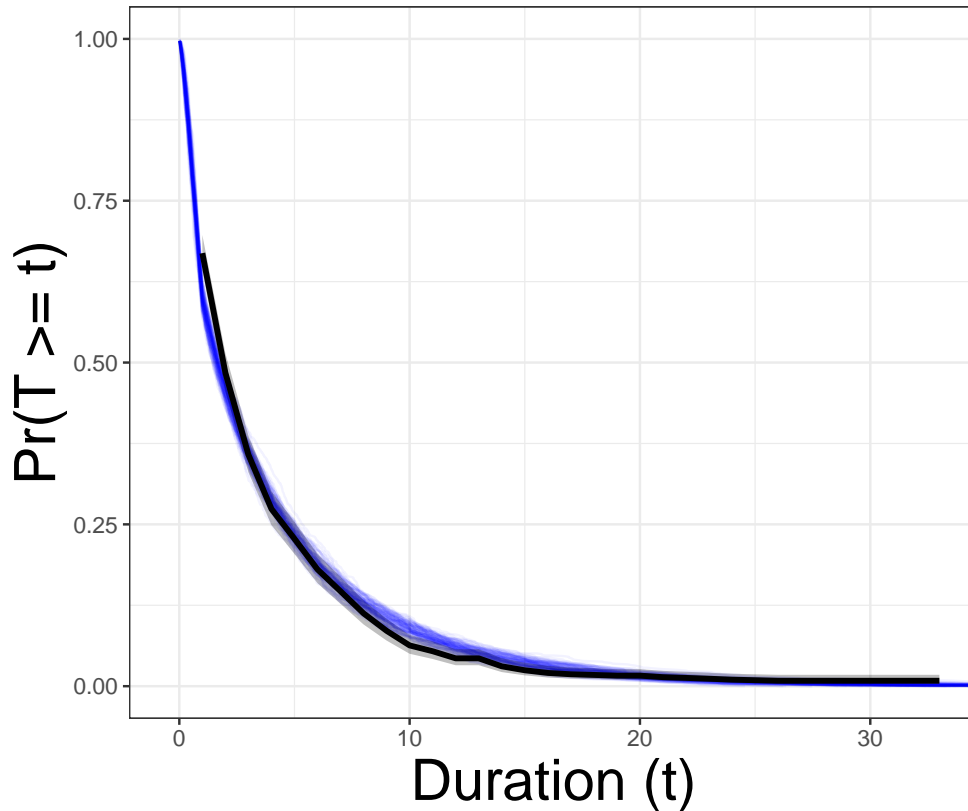

Figure 2: Comparison of the empirical estimate of  $S(t)$  (blue) versus estimates from 100 posterior predictive data sets (black).  $S(t)$  corresponds to the probability that the age of a genus  $t$  is less than the genus' ultimate duration  $T$ .

405 of the observed data appears adequate (Fig. 3, 4). Because the principle goal of this model is to obtain adequate prediction of a taxon's expected duration for a given set of ecological covariates, the seemingly adequate fit of our model to mean taxon duration is reassuring (Fig. 3).  
408 Additionally, given the skewness of the observed taxon durations (Fig. 1), the ability for the model to recapitulate the median observed taxon duration points to the overall good fit of the model to the data.

411 When considered together, all of the above posterior predictive checks indicate adequate model fit for key questions such as expected taxon duration (Fig. 3). However, there is obviously heterogeneity in model fit because, while the model can recapitulate some aspects of the observed

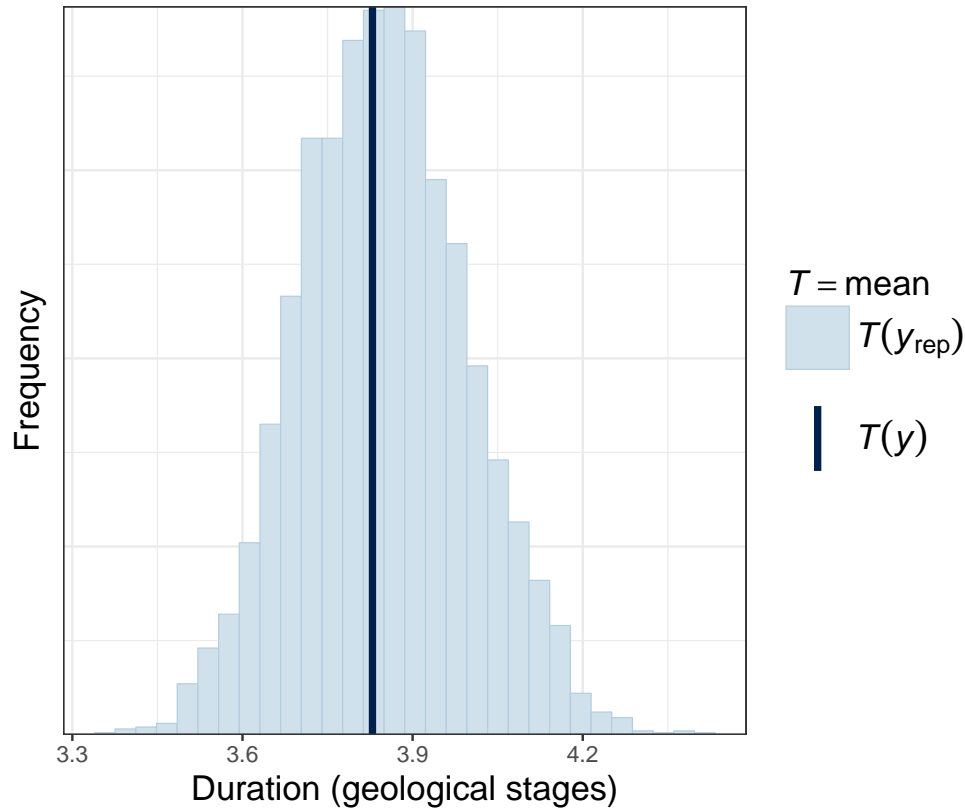

Figure 3: Comparison of the (A) observed mean genus duration (black vertical line) to a distribution of means estimated from 100 simulated datasets (blue). Model fit is evaluated by the similarity between the observed and the estimated, where good fit is demonstrated by the vertical line being “within” the simulated distribution.

414 data (Fig. 3, 4), there are obvious discrepancies between the model and the data (Fig. 1, 2). By performing the same posterior predictive tests for each of the origination cohorts, it may be possible to get a better picture of the sources of model misfit.

417 When the posterior predictive tests are visualized for each of the origination cohorts, a complex picture of model fit emerges. For nearly every origination cohort, the model is able to recapitulate the observed mean duration (Fig. 5). In comparison, the model has a much more  
420 heterogeneous fit to each origination cohort’s median taxon duration (Fig. 6). The skewness of the distribution underlying figure 1 means that for some origination cohorts, median duration

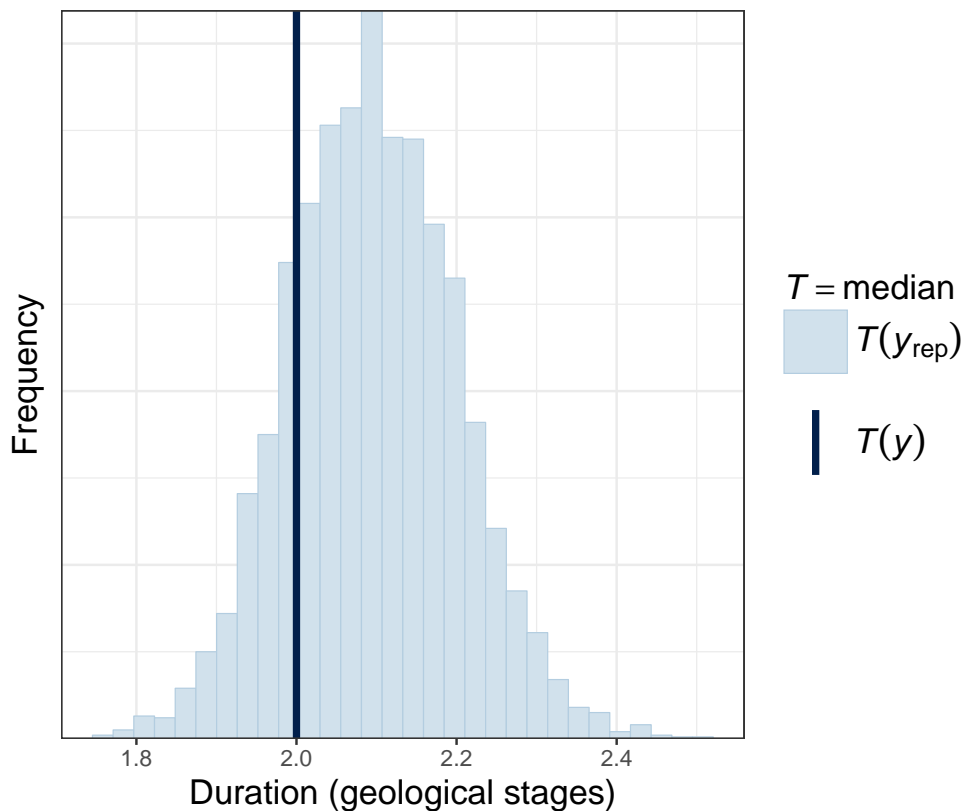

Figure 4: Comparison of the observed median genus duration (black vertical line) to a distribution of medians estimated from 100 simulated datasets (blue). Model fit is evaluated by the similarity between the observed and the estimated, where good fit is demonstrated by the vertical line being “within” the simulated distribution.

might be pegged at 1 stage; this means that the posterior predictive distributions for some cohorts  
423 can be extremely skewed.

These results indicate that this model is very good at recapitulate mean taxon duration  
(Fig. 3, 5) and that it is capable of estimating overall median duration and median duration of  
426 most origination cohorts (Fig. 4, 6). The poor model fit to some origination cohorts may indicate  
that these cohorts are undergoing a different extinction process whose aspects are unmodeled in  
this analysis. For those cohorts where the model recapitulates the empirical survival function,  
429 the model is capturing some aspect of the processes underlying taxon extinction.

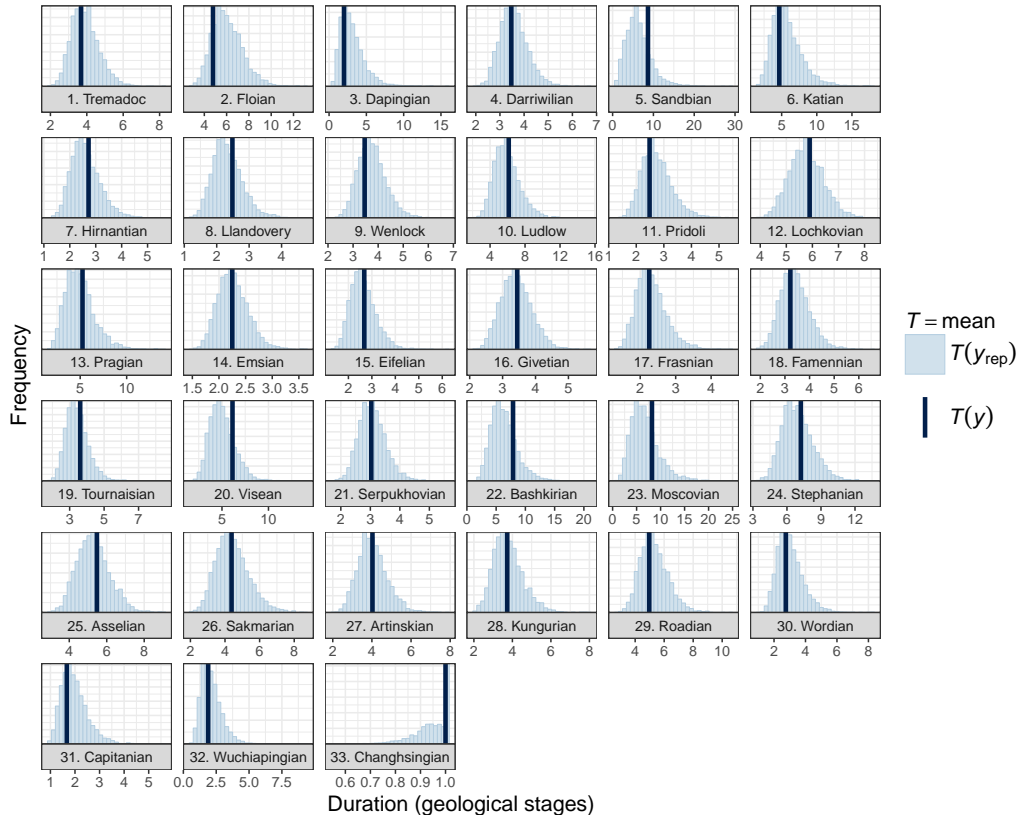

Figure 5: Comparison of the observed mean genus duration (black vertical line) to a distribution of means estimated from 100 simulated datasets (blue) for each of the origination cohorts. Model fit is evaluated by the similarity between the observed and the estimated, where good fit is demonstrated by the vertical line being “within” the simulated distribution.

A larger than average geographic range is expected to have a positive effect on taxon survival (Table 1). The cohort-level estimate of the effect of geographic range size indicates that as a taxon’s geographic range increases, that taxon’s duration is expected to increase (Table 1). Given the estimates of  $\mu^r$  and  $\tau^r$ , there is an approximately 3.7% ( $\pm 4.3\%$  SD) probability that this relationship would be reversed ( $\Pr \mathcal{N}(\mu^r, \tau^r) > 0$ ).

Body size measured as valve length is estimated to have no effect on duration for most of the post-Cambrian Paleozoic (Table 1).

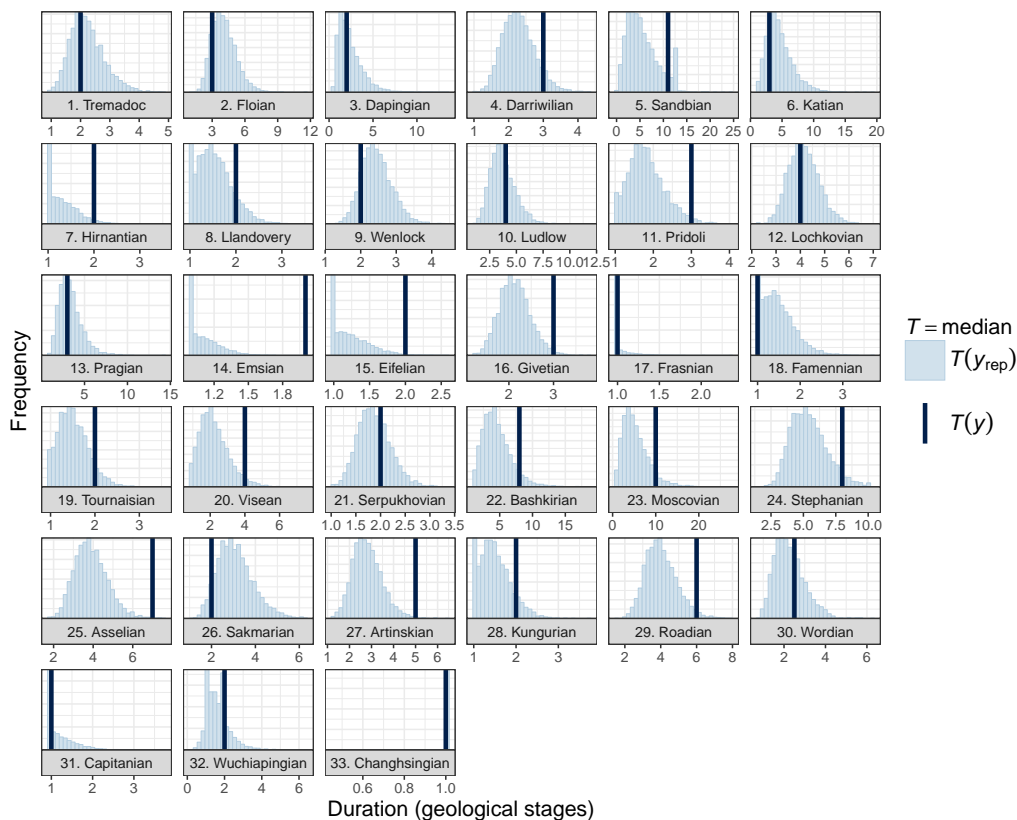

Figure 6: Comparison of the observed median genus duration (black vertical line) to a distribution of medians estimated from 100 simulated datasets (blue) for each of the origination cohorts. Model fit is evaluated by the similarity between the observed and the estimated, where good fit is demonstrated by the vertical line being “within” the simulated distribution.

Table 1: Estimates of group-level and invariant parameter values for the fitted model analyzed here.

| Category           | Parameter    | Effect of...                          | Mean  | SD   | 10%   | 50%   | 90%   |
|--------------------|--------------|---------------------------------------|-------|------|-------|-------|-------|
| Mean               | $\mu^i$      | intercept                             | -3.04 | 0.19 | -3.29 | -3.04 | -2.80 |
|                    | $\mu^r$      | geographic range                      | -0.98 | 0.16 | -1.17 | -0.98 | -0.78 |
|                    | $\mu^v$      | environmental preference              | -0.76 | 0.18 | -0.99 | -0.76 | -0.53 |
|                    | $\mu^{v^2}$  | environmental preference <sup>2</sup> | 3.15  | 0.35 | 2.71  | 3.15  | 3.59  |
|                    | $\mu^m$      | body size                             | -0.02 | 0.12 | -0.17 | -0.02 | 0.14  |
| Standard deviation | $\tau^i$     | intercept                             | 0.50  | 0.11 | 0.38  | 0.50  | 0.65  |
|                    | $\tau^r$     | geographic range                      | 0.49  | 0.16 | 0.29  | 0.49  | 0.70  |
|                    | $\tau^v$     | environmental preference              | 0.83  | 0.16 | 0.63  | 0.82  | 1.05  |
|                    | $\tau^{v^2}$ | environmental preference <sup>2</sup> | 1.49  | 0.35 | 1.08  | 1.46  | 1.94  |
|                    | $\tau^m$     | body size                             | 0.47  | 0.12 | 0.32  | 0.46  | 0.63  |
| Other              | $\delta$     | sampling                              | 0.90  | 0.15 | 0.71  | 0.89  | 1.08  |
|                    | $\alpha$     | ageing                                | 1.36  | 0.04 | 1.30  | 1.36  | 1.42  |

Note: These parameters are the group-level estimates of the effects of biological traits on brachiopod generic survival, the standard deviation of the between-cohort effects, as well as the estimates of the effect of sampling  $\delta$  and the Weibull shape parameter  $\alpha$ . The mean, standard deviation (SD), 10th, 50th, and 90th quantiles of the marginal posteriors are presented.



The group-level relationship between effect of environmental preference and duration is estimated from  $\mu^v$  and  $\mu^{v^2}$ . The estimate of  $\mu^v$  indicates that taxa which slightly prefer epicontinental environments to open-ocean environments are expected to have a greater duration than open-ocean favoring taxa (Table 1). Additionally, given the estimate of between-cohort variance  $\tau^v$ , there is approximately 18.1% ( $\pm 7.5\%$  SD) probability that, for any given cohort, taxa which favor open-ocean environments would have a greater expected duration than taxa which favor epicontinental environments ( $\Pr(\mathcal{N}(\mu^v, \tau^v) > 0)$ ). The estimate of  $\mu^{v^2}$  indicates that the overall relationship between environmental preference and  $\log(\sigma)$  is concave-down (Fig. 7), with only a 2.5% ( $\pm 2.9\%$  SD) probability that any given cohort is convex up ( $\Pr(\mathcal{N}(\mu^{v^2}, \tau^{v^2}) < 0)$ ).

The cohort-specific relationships between environmental preference and  $\log(\sigma)$  were calculated from the estimates of  $\beta^0$ ,  $\beta^v$ , and  $\beta^{v^2}$  (Fig. 8) and reflect how these three parameters act in concert, not individually (Fig. 9). Because of the relationship between  $\beta^v$  and  $\beta^{v^2}$ , it is important to consider them together when drawing conclusions from the model. In many cases, the cohort-specific estimated relationship between environmental preference and duration is approximately equal to the group-level average, but for 14 of the 33 analyzed origination cohorts at least one of these three parameters are noticeably different from the group-level average.

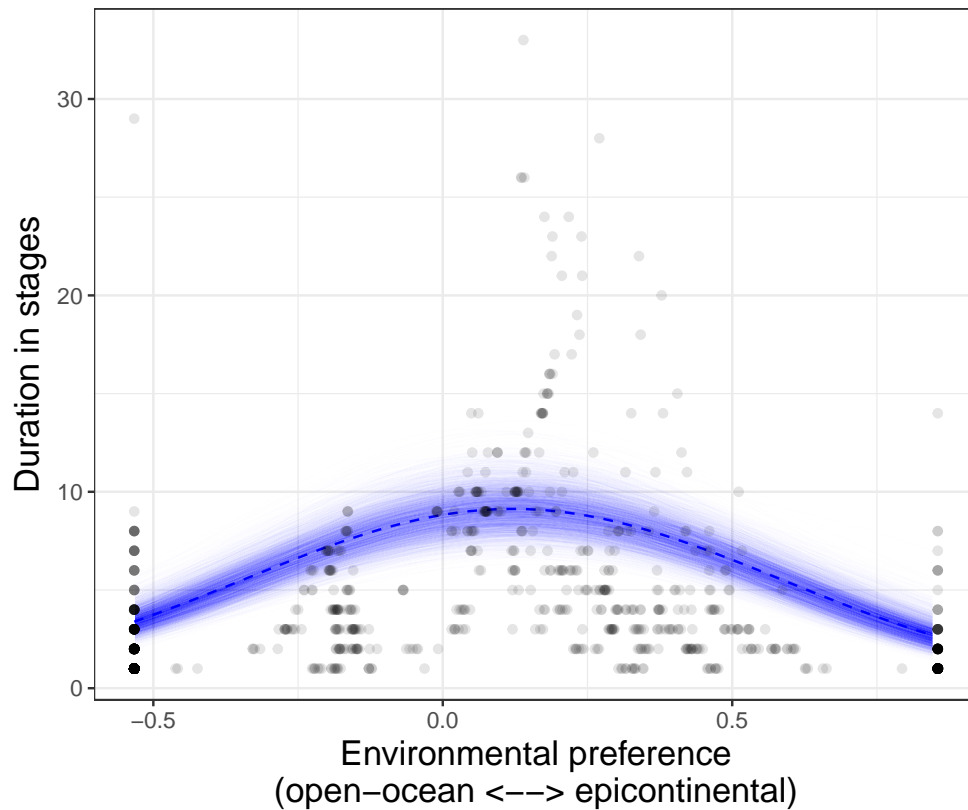

Figure 7: The overall expected relationship between environmental affinity  $v_i$  and a  $\log(\sigma)$  when  $r = 0$  and  $m = 0$ . The 1000 semi-transparent lines corresponds to a single draw from the posterior predictive distribution, while the highlighted line corresponds to the median of the posterior predictive distribution. The overall relationship demonstrates a greater durations among environmental generalists than specialists. Additionally, because the apex of is rightward from 0, taxa favoring epicontinental environments are expected to have a slightly longer durations than those favoring open-ocean environments. The tick marks along the bottom of the plot correspond to the (rescaled) observed values of environmental preference.

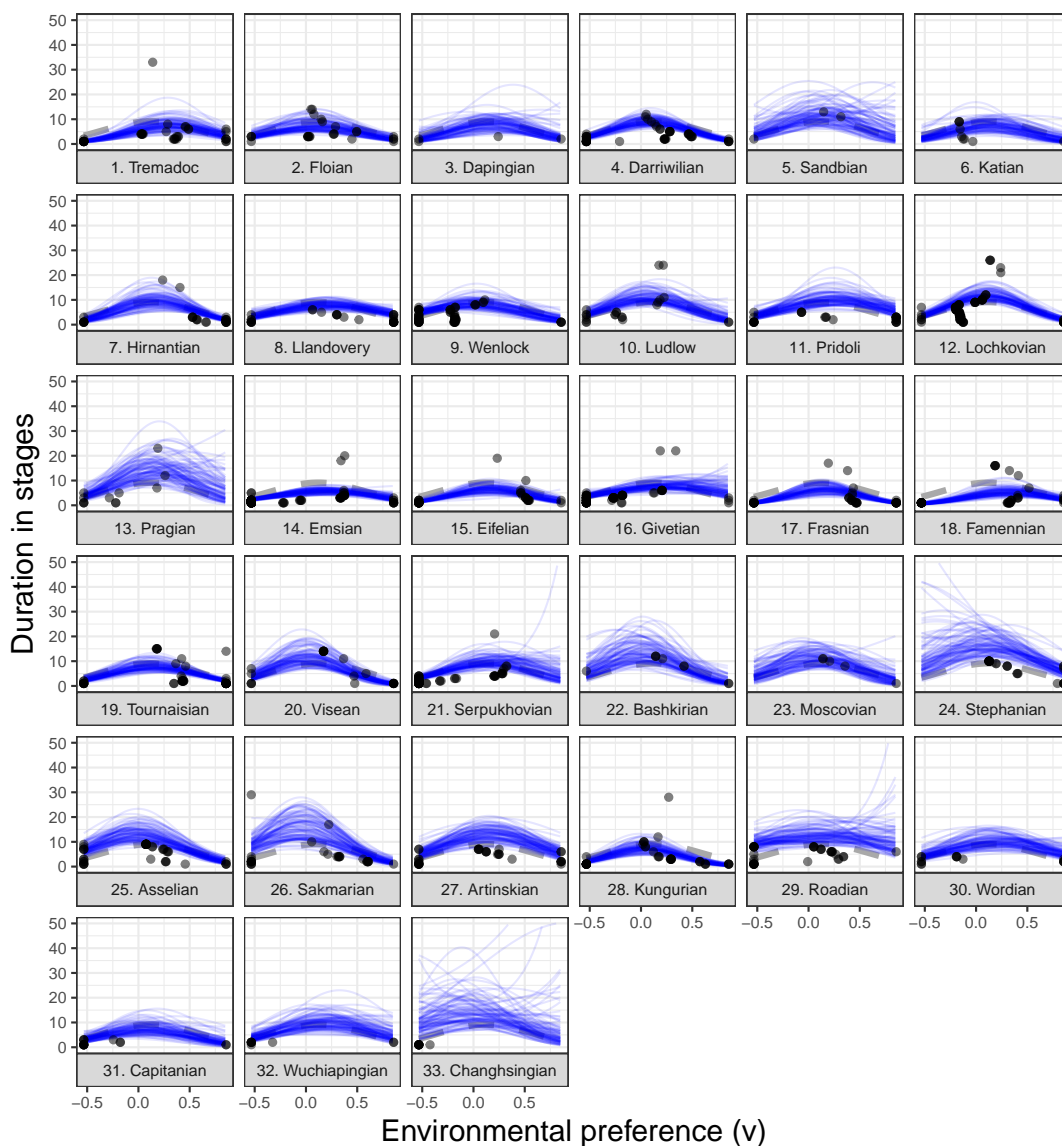

Figure 8: Comparison of origination cohort-specific (posterior predictive) estimates of the effect of environmental preference on  $\log(\sigma)$  to the mean overall estimate of the effect of environmental preference. Cohort-specific estimates are from 100 posterior predictive simulations across the range of (transformed and rescaled) observed values of environmental preference. The oldest cohort is in the top-left and younger cohorts proceed left to right, with the youngest cohort being the right-most facet of the last row. Panel names correspond to the name of the stage in which that cohort originated.

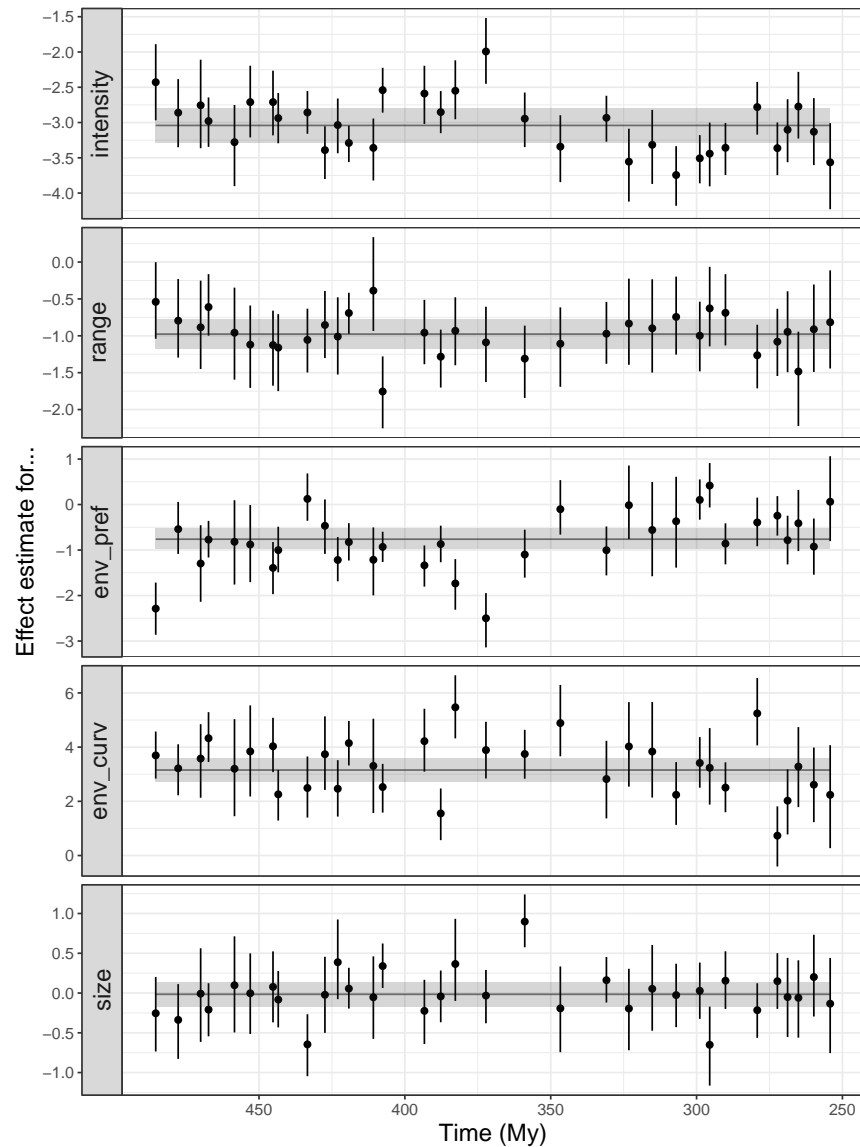

Figure 9: Comparison of cohort-specific estimates of  $\beta^0$ , the effect of geographic range on extinction risk  $\beta^r$ , the effect of environmental preference  $\beta^v$  and  $\beta^{v^2}$ , and body size  $\beta^m$ . Points correspond to the median of the cohort-specific estimate, along with 80% credible intervals. Points are plotted at the midpoint of the cohorts stage of origination in millions of years before present (My). Black, horizontal lines are the overall estimates of covariate effects along with 80% credible intervals (shaded).

453 There is an approximately 90.4% probability that cohort estimates of  $\beta^0$  and  $\beta^r$  are negatively  
correlated, with median estimate of correlation being -0.35 (Fig. 10). This result means that  
for any cohort, we would expect that if extinction intensity increases ( $\beta^0$  increases), the effect  
456 of geographic range on duration increases ( $\beta^r$  decreases). This result is strong evidence for a  
relationship between intensity and selectivity with respect to geographic range size.

I estimate a 97.9% probability that the cohort-specific estimates of  $\beta^0$  and  $\beta^v$  are negatively  
459 correlated, with a median correlation of -0.49 (Fig. 10). This result means that as extinction  
intensity increases it is expected that epicontinental taxa become more favored over open-ocean  
environments (i.e. as  $\beta^0$  increases,  $\beta^v$  decreases). This result is strong evidence for a relationship  
462 between intensity and selectivity with respect to the linear aspect of environmental preference.

Correlations between the non-intercept estimates reflect potential similarities in selective pres-  
sures between cohorts, however there is only weak evidence of any potential cross-correlations  
465 in cohort-specific covariate effects (Fig. 10). There is an approximate 31.2% probability that  $\beta^r$   
and  $\beta^v$  are positively correlated. This lack of cross-correlation may be due in part to the higher  
between-cohort variance of the effect of environmental preference  $\tau^v$  compared to the very small  
468 between-cohort variance in the effect of geographic range  $\tau^r$  (Table 1); the effect of geographic  
range might simply not vary enough relative to environmental preference.

Conversely, there is a 74.6% probability that estimates of the effect of geographic range ( $\beta^r$ )  
471 and the quadratic aspect of environmental preference ( $\beta^{v^2}$ ) are positively correlated; this is weak  
evidence of a relationship between the effects of these covariates (Fig. 10). Thus, as the effect  
of geographic range increases, we might expect the peakedness of relationship between environ-  
474 mental preference and duration to increase. However, because there is only a 74.6% probability  
of a positive correlation, this result cannot be interpreted with authority. Instead, this result is an  
opportunity for future research to further explore the potential relationship between geographic  
477 range, environmental preference, and species duration.

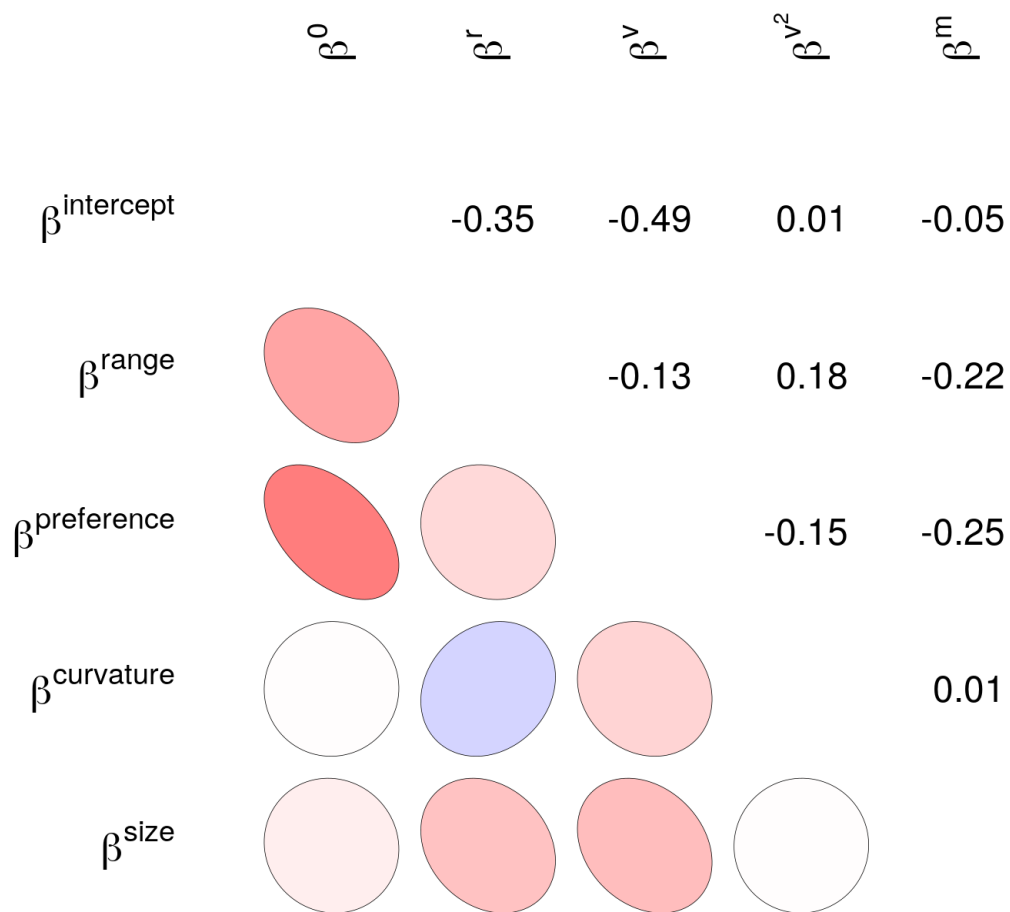

Figure 10: Mixed graphical and numerical representation of the correlation matrix  $\Omega$  of variation in cohort-specific covariate estimates. These correlations are between the estimates of the cohort-level effects of covariates, along with intercept/baseline extinction risk. The median estimates of the correlations are presented numerically (upper-triangle) and as idealized ellipses representing that much correlation (lower-triangle). The darkness of the ellipse corresponds to the magnitude of the correlation.

Sampling was found to have a negative effect (positive  $\delta$ ) on duration: greater sampling, shorter duration (Table 1). While potentially counter-intuitive, this result is most likely due to some long lived taxa only be sampled in the stages of it's first and last appearance. Also, longer lived taxa have more opportunities to evade sampling than shorter lived taxa. These two factors will lead to this result.

The Weibull shape parameter  $\alpha$  was found to be approximately 1.41 ( $\pm 0.05$  SD) with a 100% probability of being greater than 1. This result is not consistent with the Law of Constant Extinction (Van Valen, 1973) and is instead consistent with accelerating extinction risk with taxon age. This result is consistent with recent empirical results and may be caused by newly originating species having a fundamentally lower risk of extinction compared to species which have already originated (Quental and Marshall, 2013; Smits, 2015; Wagner and Estabrook, 2014). This result is also consistent with a recently proposed nearly-neutral evolution where competition/selection/evolution drives whole communities to increase in average fitness over time while still maintaining constant relative fitness across the community, thus older species are more likely to go extinct because of having a fundamentally lower average fitness than newly originating species (Rosindell et al., 2015). This result, however, is not consistent with other empirical results from the marine fossil record (Crampton et al., 2016; Finnegan et al., 2008) and could potentially be caused by the minimum resolution of the fossil record (Sepkoski, 1975). It is thus unclear whether a strong biological inference can be made from this result, which means that further work is necessary on the effect of taxon age on extinction risk.

## Discussion

The generating observation behind this study was that for bivalves at the end Cretaceous mass extinction event, the only biological trait that was found to affect extinction risk was geographic range, while traits that had previously been associated with difference in duration had no effect (Jablonski, 1986). This observation raises two linked questions: how does the effect of geographic

range change with changing extinction intensity, and how to the effects of other biological traits

504 change with changing extinction intensity?

I find that as intensity increases ( $\beta^0$  increases), the magnitude of the effect of geographic range increases ( $\beta^r$  decreases). I also find that as intensity increases, the difference in survival for taxa favoring epicontinental environments over open-ocean environments is expected to decrease; this is consistent with the results of Miller and Foote (2009). Finally, there is no evidence for a correlation between the effects of geographic range and environmental preference on taxon duration.

I find consistent support for the “survival of the unspecialized,” with respect to epicontinental versus open-ocean environmental preference, as a time-invariant generalization of brachiopod survival (Simpson, 1944). Taxa with intermediate environmental preferences are expected to have lower extinction risk than taxa specializing in either epicontinental or open-ocean environments (Fig. 7), though the curvature of the relationship varies from rather shallow to very peaked (Fig. 8). However, this relationship is not symmetric about 0, as taxa favoring epicontinental environments are expected with approximately 75% probability to have a greater duration than taxa favoring open-ocean environments. This description of environment preference is only one major aspect of a taxon’s environmental context, with factors such as bathymetry and temperature being further descriptors of a taxon’s adaptive zone (Harnik, 2011; Harnik et al., 2012; Heim and Peters, 2011; Nürnberg and Aberhan, 2013); inclusion of these factors in future analyses would potentially improve our understanding of the extent and complexity of the “survival of the unspecialized” hypothesis as it applies to all dimensions of an adaptive zone.

Hopkins et al. (2014), in their analysis of niche conservatism and substrate preference in marine invertebrates, found that brachiopods were among the least “conservative” groups, with taxa found to change substrate preference on short time scales. While substrate preference is not the same as environmental preference (as defined here), a question does arise: are there three classes of environmental preference instead of two? These classes would be taxa with broad tolerance (“true” generalists), inflexible specialists (“true” specialists), and flexible specialists. A flexible



taxon is one with a narrow habitat preference at one time but with preference that changes over  
531 time with changing environmental availability. My analysis assumes that traits are constant over  
the duration of the taxon, meaning that this scenario is not detectable: taxa with broad tolerances  
and flexible taxa with narrow per-stage preference end up being treated the same way. Future  
534 work should explore how environmental preference changes over lineage duration in relation  
to environmental availability to estimate if the generalists–specialists continuum is actually a  
ternary relationship.

537 The analysis presented in this paper is an example of how to approach the interplay between  
selection and intensity using a continuous-survival framework. An alternative framework would  
be a discrete-time survival analysis (Tutz and Schmid, 2016) where species survival is tracked  
540 at discrete intervals. An example of a discrete-time survival approach that has become increas-  
ingly popular in paleontological analysis is the Cormack-Jolly-Seber (CJS) model (Liow et al.,  
2008; Liow and Nichols, 2010; Royle and Dorazio, 2008; Tomiya, 2013). Discrete-survival anal-  
543 ysis has some advantages over continuous-time approaches, specifically the ease of including  
time-varying covariates and well known extensions for allowing incomplete sampling (e.g. CJS  
model).

546 Something that has not been modeled in these discrete-time analysis is the effect of an age-  
based varying-intercept or covariate on duration as recommended by Tutz and Schmid (2016); this  
is extremely important for estimating the effect of taxon age on survival. Those varying-intercept  
549 estimates would then be equivalent to the hazard function when all covariates are equal to 0  
(Tutz and Schmid, 2016). A good avenue for future applied research would be a CJS-type model  
with survival modeled as a multi-level regression as in this study, combined with an age-based  
552 varying-intercept as recommended by Tutz and Schmid (2016). A major hurdle to this analysis  
would be the necessity of imputing all time-varying covariates for every taxon that is estimated  
to be present in a time intervals but was not sampled.

555 The model used here could be improved through either increasing the number of analyzed  
traits, expanding the hierarchical structure of the model to include other major taxonomic groups

of interest, or including explicit phylogenetic relationships between the taxa in the model as an  
558 additional hierarchical effect. An example trait that may be of particular interest is the affixing  
strategy or method of interaction with the substrate of the taxon, which has been found to  
be related to brachiopod survival where, for cosmopolitan taxa, taxa that are attached to the  
561 substrate are expected to have a greater duration than those that are not (Alexander, 1977).

It is theoretically possible to expand this model to allow for comparisons within and between  
major taxonomic groups, which would better constrain the brachiopod estimates while also al-  
564 lowing for estimation of similarities and differences in cross-taxonomic patterns. The difficulty  
with this particular model expansion is in finding a similarly well-sampled taxonomic group  
that is present during the Paleozoic. Potential groups include Crinoidea, Ostracoda, and other  
567 members of the “Paleozoic fauna” (Sepkoski, 1981).

With significant updates, it would also be possible to compare the brachiopod record with  
Modern groups such as bivalves or gastropods (Sepkoski, 1981), while remembering that the  
570 groups may not necessarily share all cohorts with the brachiopods. This particular model ex-  
pansion would act as a test of any universal cross-taxonomic patterns in the effects of emergent  
traits on extinction, as has been proposed for geographic range (Payne and Finnegan, 2007). Ad-  
573 ditionally, this expanded model would also act as a test of the distinctness of the Sepkoski (1981)  
three-fauna hypothesis in terms of trait-dependent extinction.

Traits like environmental preference or geographic range (Hunt et al., 2005; Jablonski, 1987)  
576 are most likely heritable. Without phylogenetic context, this analysis assumes that differences  
in extinction risk between taxa are independent of the shared evolutionary history of those taxa  
(Felsenstein, 1985). In contrast, the origination cohorts only capture shared temporal context. For  
579 example, if taxon duration is phylogenetically heritable, then closely related taxa may have more  
similar durations as well as more similar biological traits. Without taking into account phyloge-  
netic similarity the effects of these biological traits would be inflated solely due to inheritance.  
582 The inclusion of phylogenetic context as an additional individual-level hierarchical effect, inde-  
pendent of origination cohort, would allow for determining how much of the observed variability

is due to shared evolutionary history versus shared temporal context versus actual differences  
585 associated with biological traits (Smits, 2015).

The combination and integration of the phylogenetic comparative and paleontological approaches requires both sources of data, something which is not possible for this analysis because  
588 there is no phylogenetic hypothesis for all Paleozoic taxa, which is frequently the case for marine invertebrates with a good fossil record. When both data sources are available the analysis can more fully address the questions of interest in macroevolution (Fritz et al., 2013; Harnik et al.,  
591 2014; Raia et al., 2012, 2013; Simpson et al., 2011; Slater, 2013, 2015; Slater et al., 2012; Smits, 2015; Tomiya, 2013).

## Conclusion

594 My analysis demonstrates that for post-Cambrain Paleozoic brachiopods, as extinction intensity increases and average fitness decreases, such as in a mass extinction, the trait-associated differences in fitness (selection) would increase and be greater than average. In contrast, during  
597 periods of low extinction intensity when fitness is greater than average, my model predicts that geographic range – and environmental preference – associated with differences in fitness (i.e. selection) would decrease and be less than average. Taken together, these results point to a  
600 potential macroevolutionary mechanism behind differences in trait-based survival during mass extinctions due to a correlation between intensity and selectivity. Additionally, I find continued support for greater survival in environmental generalists over specialists; this is further evidence  
603 that the long standing “survival of the unspecialized” hypothesis (Baumiller, 1993; Liow, 2004, 2007; Nürnberg and Aberhan, 2013, 2015; Simpson, 1944, 1953; Smits, 2015) should be considered the default hypothesis. Overall, this analysis further refines our knowledge of brachiopod  
606 extinction dynamics while also revealing a potential macroevolutionary mechanism behind the difference between so-called mass and background extinction regimes.

## Literature Cited

- 609 Alexander, R. R. 1977. Generic longevity of articulate brachiopods in relation to the mode of  
stabilization on the substrate. *Palaeogeography, Palaeoclimatology, Palaeoecology* 21:209–226.
- Alroy, J. 2010. The Shifting Balance of Diversity Among Major Marine Animal Groups. *Science*  
612 329:1191–1194.
- . 2014. A simple Bayesian method of inferring extinction. *Paleobiology* 40:584–607.
- Baumiller, T. K. 1993. Survivorship analysis of Paleozoic Crinoidea: effect of filter morphology  
615 on evolutionary rates. *Paleobiology* 19:304–321.
- Chao, A., T. C. Hsieh, R. L. Chazdon, R. K. Colwell, N. J. Gotelli, and B. D. Inouye. 2015. Unveiling  
the species-rank abundance distribution by generalizing the Good-Turing sample coverage  
618 theory. *Ecology* 96:1189–1201.
- Cooper, W. S. 1984. Expected time to extinction and the concept of fundamental fitness. *Journal*  
of Theoretical Biology 107:603–629.
- 621 Crampton, J. S., R. A. Cooper, P. M. Sadler, and M. Foote. 2016. Greenhouse–icehouse transi-  
tion in the Late Ordovician marks a step change in extinction regime in the marine plankton.  
*Proceedings of the National Academy of Sciences* 113:1498–1503.
- 624 Eronen, J. T., A. R. Evans, M. Fortelius, and J. Jernvall. 2011. Genera Are Often Better Than Species  
for Detecting Evolutionary Change in the Fossil Record: a Reply To Salesa Et Al. *Evolution*  
65:1514–1516.
- 627 Ezard, T. H. G., P. N. Pearson, T. Aze, and A. Purvis. 2012. The meaning of birth and death (in  
macroevolutionary birth-death models). *Biology Letters* 8:139–142.
- Felsenstein, J. 1985. Phylogenies and the comparative method. *The American Naturalist* 125:1–15.

- 630 Finnegan, S., N. A. Heim, S. E. Peters, and W. W. Fischer. 2012. Climate change and the selective signature of the Late Ordovician mass extinction. *Proceedings of the National Academy of Sciences* 109:6829–6834.
- 633 Finnegan, S., J. L. Payne, and S. C. Wang. 2008. The Red Queen revisited: reevaluating the age selectivity of Phanerozoic marine genus extinctions. *Paleobiology* 34:318–341.
- Fitzjohn, R. G. 2010. Quantitative Traits and Diversification. *Systematic Biology* 59:619–633.
- 636 Foote, M. 1988. Survivorship analysis of Cambrian and Ordovician Trilobites. *Paleobiology* 14:258–271.
- . 2000a. Origination and extinction components of taxonomic diversity: general problems. 639 *Paleobiology* 26:74–102.
- . 2000b. Origination and extinction components of taxonomic diversity: Paleozoic and post-Paleozoic dynamics. *Paleobiology* 26:578–605.
- 642 ———. 2001. Inferring temporal patterns of preservation, origination, and extinction from taxonomic survivorship analysis. *Paleobiology* 27:602–630.
- . 2014. Environmental controls on geographic range size in marine animal genera. 645 *Paleobiology* 40:440–458.
- Foote, M., J. S. Crampton, A. G. Beu, B. a. Marshall, R. a. Cooper, P. a. Maxwell, and I. Matcham. 2007. Rise and fall of species occupancy in Cenozoic fossil mollusks. *Science* (New York, N.Y.) 318:1131–1134. 648
- Foote, M., and A. I. Miller. 2013. Determinants of early survival in marine animal genera. *Paleobiology* 39:171–192.
- 651 Foote, M., and D. M. Raup. 1996. Fossil preservation and the stratigraphic ranges of taxa. *Paleobiology* 22:121–140.

- 654 Fritz, S. A., J. Schnitzler, J. T. Eronen, C. Hof, K. Böhning-Gaese, and C. H. Graham. 2013. Diversity in time and space: wanted dead and alive. *Trends in Ecology & Evolution* 28:509–516.
- Gelman, A., J. B. Carlin, H. S. Stern, D. B. Dunson, A. Vehtari, and D. B. Rubin. 2013. *Bayesian data analysis*. 3rd ed. Chapman and Hall, Boca Raton, FL.
- 657 Gelman, A., and J. Hill. 2007. *Data Analysis using Regression and Multilevel/Hierarchical Models*. Cambridge University Press, New York, NY.
- Goldberg, E. E., L. T. Lancaster, and R. H. Ree. 2011. Phylogenetic inference of reciprocal effects  
660 between geographic range evolution and diversification. *Systematic Biology* 60:451–465.
- Goldberg, E. E., K. Roy, R. Lande, and D. Jablonski. 2005. Diversity, endemism, and age distributions in macroevolutionary sources and sinks. *The American Naturalist* 165:623–633.
- 663 Harnik, P. G. 2011. Direct and indirect effects of biological factors on extinction risk in fossil bivalves. *Proceedings of the National Academy of Sciences* 108:13594–13599.
- Harnik, P. G., P. C. Fitzgerald, J. L. Payne, and S. J. Carlson. 2014. Phylogenetic signal in extinction  
666 selectivity in Devonian terebratulide brachiopods. *Paleobiology* 40:675–692.
- Harnik, P. G., C. Simpson, and J. L. Payne. 2012. Long-term differences in extinction risk among the seven forms of rarity. *Proceedings of the Royal Society B: Biological Sciences* 279:4969–4976.
- 669 Heim, N. A., and S. E. Peters. 2011. Regional environmental breadth predicts geographic range and longevity in fossil marine genera. *PloS one* 6:e18946.
- Hijmans, R. J. 2015. raster: Geographic data analysis and modeling. R package version 2.3-24.
- 672 Hoehn, K. B., P. G. Harnik, and V. L. Roth. 2015. A framework for detecting natural selection on traits above the species level. *Methods in Ecology and Evolution* pages doi: 10.1111/2041—210X.12461.

- 675 Hoffman, M. D., and A. Gelman. 2014. The No-U-Turn Sampler: Adaptively Setting Path Lengths  
in Hamiltonian Monte Carlo. *Journal of Machine Learning Research* 15:1351–1381.
- Hopkins, M. J., C. Simpson, and W. Kiessling. 2014. Differential niche dynamics among major  
678 marine invertebrate clades. *Ecology Letters* 17:314–323.
- Hunt, G., and D. L. Rabosky. 2014. Phenotypic Evolution in Fossil Species: Pattern and Process.  
*Annual Review of Earth and Planetary Sciences* 42:421–441.
- 681 Hunt, G., K. Roy, and D. Jablonski. 2005. Species-level heritability reaffirmed: a comment on “On  
the heritability of geographic range sizes”. *The American Naturalist* 166:129–135.
- Jablonski, D. 1986. Background and mass extinctions: the alternation of macroevolutionary  
684 regimes. *Science* 231:129–133.
- . 1987. Heritability at the species level: analysis of geographic ranges of cretaceous mol-  
lusks. *Science* 238:360–363.
- 687 ———. 2008. Species Selection: Theory and Data. *Annual Review of Ecology, Evolution, and*  
*Systematics* 39:501–524.
- Jablonski, D., and J. A. Finarelli. 2009. Congruence of morphologically-defined genera with  
690 molecular phylogenies. *Proceedings of the National Academy of Sciences* 106:8262–8266.
- Jablonski, D., and K. Roy. 2003. Geographical range and speciation in fossil and living molluscs.  
*Proceedings of the Royal Society B: Biological Sciences* 270:401–406.
- 693 Jernvall, J., and M. Fortelius. 2002. Common mammals drive the evolutionary increase of hyp-  
sodonty in the Neogene. *Nature* 417:538–540.
- Johnson, J. G. 1974. Extinction of Perched Faunas. *Geology* 2:479–482.
- 696 Kiessling, W., and M. Aberhan. 2007. Environmental determinants of marine benthic biodiversity  
dynamics through Triassic – Jurassic time. *Paleobiology* 33:414–434.

- 699 Klein, J. P., and M. L. Moeschberger. 2003. *Survival Analysis: Techniques for Censored and Truncated Data*. 2nd ed. Springer, New York.
- Kleinbaum, D. G., and M. Klein. 2005. *Survival analysis: a self-learning text*. 2nd ed. Springer, New York, NY.
- 702 Lewandowski, D., D. Kurowicka, and H. Joe. 2009. Generating random correlation matrices based on vines and extended onion method. *Journal of Multivariate Analysis* 100:1989–2001.
- Liow, L. H. 2004. A test of Simpson’s “rule of the survival of the relatively unspecialized” using  
705 fossil crinoids. *The American Naturalist* 164:431–443.
- . 2007. Does versatility as measured by geographic range, bathymetric range and morphological variability contribute to taxon longevity? *Global Ecology and Biogeography* 16:117–128.
- 708 Liow, L. H., M. Fortelius, E. Bingham, K. Lintulaakso, H. Mannila, L. Flynn, and N. C. Stenseth. 2008. Higher origination and extinction rates in larger mammals. *Proceedings of the National Academy of Sciences* 105:6097–6102.
- 711 Liow, L. H., and J. D. Nichols. 2010. Estimating rates and probabilities of origination and extinction using taxonomic occurrence data: Capture-mark-recapture (CMR) approaches. Pages 81–94 in J. Alroy and G. Hunt, eds. *Quantitative Methods in Paleobiology*. The Paleontological  
714 Society.
- Liow, L. H., T. B. Quental, and C. R. Marshall. 2010. When can decreasing diversification rates be detected with molecular phylogenies and the fossil record? *Systematic biology* 59:646–659.
- 717 Maddison, W. P., P. E. Midford, and S. P. Otto. 2007. Estimating a binary character’s effect on speciation and extinction. *Systematic Biology* 56:701.
- Miller, A. I., and M. Foote. 2009. Epicontinental seas versus open-ocean settings: the kinetics of  
720 mass extinction and origination. *Science* 326:1106–1109.



- Nürnberg, S., and M. Aberhan. 2013. Habitat breadth and geographic range predict diversity dynamics in marine Mesozoic bivalves. *Paleobiology* 39:360–372.
- 723 ———. 2015. Interdependence of specialization and biodiversity in Phanerozoic marine invertebrates. *Nature Communications* 6:6602.
- Palmer, M. E., and M. W. Feldman. 2012. Survivability is more fundamental than evolvability. 726 *PloS one* 7:e38025.
- Payne, J. L., A. M. Bush, E. T. Chang, N. A. Heim, M. L. Knope, and S. B. Pruss. 2016. Extinction intensity, selectivity and their combined macroevolutionary influence in the fossil record. 729 *Biology Letters* 12:20160202.
- Payne, J. L., and S. Finnegan. 2007. The effect of geographic range on extinction risk during background and mass extinction. *Proceedings of the National Academy of Sciences* 104:10506–732 10511.
- Payne, J. L., N. A. Heim, M. L. Knope, and C. R. McClain. 2014. Metabolic dominance of bivalves predates brachiopod diversity decline by more than 150 million years. *Proceedings of the Royal Society B: Biological Sciences* 281:20133122. 735
- Peters, S. E. 2007. The problem with the Paleozoic. *Paleobiology* 33:165–181.
- . 2008. Environmental determinants of extinction selectivity in the fossil record. *Nature* 738 454:626–629.
- Quental, T. B., and C. R. Marshall. 2009. Extinction during evolutionary radiations: reconciling the fossil record with molecular phylogenies. *Evolution* 63:3158–3167.
- 741 ———. 2013. How the Red Queen Drives Terrestrial Mammals to Extinction. *Science* 341:290–292.
- Rabosky, D. L. 2010. Extinction rates should not be estimated from molecular phylogenies. *Evolution* 64:1816–1824.

- 744 Rabosky, D. L., and A. R. McCune. 2010. Reinventing species selection with molecular phylogenies. *Trends in Ecology & Evolution* 25:68–74.
- Rabosky, D. L., F. Santini, J. Eastman, S. a. Smith, B. Sidlauskas, J. Chang, and M. E. Alfaro. 2013. Rates of speciation and morphological evolution are correlated across the largest vertebrate  
747 radiation. *Nature Communications* 4:1–8.
- Raia, P., F. Carotenuto, F. Passaro, D. Fulgione, and M. Fortelius. 2012. Ecological specialization  
750 in fossil mammals explains Cope’s rule. *The American Naturalist* 179:328–337.
- Raia, P., F. Carotenuto, F. Passaro, P. Piras, D. Fulgione, L. Werdelin, J. Saarinen, and M. Fortelius. 2013. Rapid action in the Palaeogene, the relationship between phenotypic and taxonomic  
753 diversification in Coenozoic mammals. *Proceedings of the Royal Society B: Biological Sciences* 280:20122244.
- Raup, D. M. 1975. Taxonomic survivorship curves and Van Valen’s Law. *Paleobiology* 1:82–96.
- 756 ———. 1978. Cohort Analysis of generic survivorship. *Paleobiology* 4:1–15.
- . 1994. The role of extinction in evolution. *Proceedings of the National Academy of Sciences* 91:6758–6763.
- 759 Ritterbush, K. A., and M. Foote. 2017. Association between geographic range and initial survival of Mesozoic marine animal genera: Circumventing the confounding effects of temporal and taxonomic heterogeneity. *Paleobiology* 43:209–223.
- 762 Rosindell, J., L. J. Harmon, and R. S. Etienne. 2015. Unifying ecology and macroevolution with individual-based theory. *Ecology Letters* 18:472–482.
- Roy D. & Valentine, I. W., K. J. 1996. Higher taxa in biodiversity studies: Patterns from eastern  
765 pacific marine molluscs. *Phil. Trans. R. Soc., Londo B* 351:1605–1613.
- Royle, J. A., and R. M. Dorazio. 2008. Hierarchical modeling and inference in ecology: the analysis of data from populations, metapopulations and communities. Elsevier, London.

- 768 Rubin, D. B. 1996. Multiple imputation after 18+ years. *Journal of the American Statistical Association* 91:473–489.
- Sepkoski, J. J. 1975. Stratigraphic biases in the analysis of taxonomic survivorship. *Paleobiology*  
771 1:343–355.
- . 1981. A factor analytic description of the Phanerozoic marine fossil record. *Paleobiology*  
7:36–53.
- 774 Sheehan, P. M. 2001. The late Ordovician mass extinction. *Annual Review of Earth and Planetary Sciences* 29:331–364.
- Simpson, C. 2006. Levels of selection and large-scale morphological trends. Ph.D. thesis. University of Chicago.  
777
- Simpson, C., and P. G. Harnik. 2009. Assessing the role of abundance in marine bivalve extinction over the post-Paleozoic. *Paleobiology* 35:631–647.
- 780 Simpson, C., W. Kiessling, H. Mewis, R. C. Baron-Szabo, and J. Müller. 2011. Evolutionary diversification of reef corals: a comparison of the molecular and fossil records. *Evolution* 65:3274–3284.
- 783 Simpson, G. G. 1944. *Tempo and Mode in Evolution*. Columbia University Press, New York.
- . 1953. *The Major Features of Evolution*. Columbia University Press, New York.
- Slater, G. J. 2013. Phylogenetic evidence for a shift in the mode of mammalian body size evolution  
786 at the Cretaceous-Palaeogene boundary. *Methods in Ecology and Evolution* 4:734–744.
- . 2015. Iterative adaptive radiations of fossil canids show no evidence for diversity-dependent trait evolution. *Proceedings of the National Academy of Sciences* 112:4897–4902.
- 789 Slater, G. J., L. J. Harmon, and M. E. Alfaro. 2012. Integrating fossils with molecular phylogenies improves inference of trait evolution. *Evolution* 66:3931–3944.

- Smithson, M., and J. Verkuilen. 2006. A better lemon squeezer? Maximum-likelihood regression  
792 with beta-distributed dependent variables. *Psychological Methods* 11:54–71.
- Smits, P. D. 2015. Expected time-invariant effects of biological traits on mammal species duration.  
Proceedings of the National Academy of Sciences 112:13015–13020.
- 795 Solow, A. R., and W. Smith. 1997. On fossil preservation and the stratigraphic ranges of taxa.  
*Paleobiology* 23:271–277.
- Stadler, T. 2011. Mammalian phylogeny reveals recent diversification rate shifts. Proceedings of  
798 the National Academy of Sciences 108:6187–6192.
- . 2013. Recovering speciation and extinction dynamics based on phylogenies. *Journal of  
Evolutionary Biology* 26:1203–1219.
- 801 Stadler, T., and F. Bokma. 2013. Estimating speciation and extinction rates for phylogenies of  
higher taxa. *Systematic biology* 62:220–230.
- Stan Development Team. 2014. Stan: A c++ library for probability and sampling, version 2.5.0.
- 804 Stanley, S. M. 1975. A theory of evolution above the species level. Proceedings of the National  
Academy of Sciences 72:646–650.
- Team, S. D. 2017. Stan Modeling Language Users Guide and Reference Manual.
- 807 Tomiya, S. 2013. Body Size and Extinction Risk in Terrestrial Mammals Above the Species Level.  
*The American Naturalist* 182:196–214.
- Tutz, G., and M. Schmid. 2016. Modeling discrete time-to-event data. Springer International  
810 Publishing, Switzerland.
- Van Valen, L. 1973. A new evolutionary law. *Evolutionary Theory* 1:1–30.
- . 1979. Taxonomic survivorship curves. *Evolutionary Theory* 4:129–142.

- 813 Vilhena, D. A., E. B. Harris, C. T. Bergstrom, M. E. Maliska, P. D. Ward, C. A. Sidor, C. A. E.  
Strömberg, and G. P. Wilson. 2013. Bivalve network reveals latitudinal selectivity gradient at  
the end-Cretaceous mass extinction. *Scientific Reports* 3:1790.
- 816 Wagner, P. J., and G. F. Estabrook. 2014. Trait-based diversification shifts reflect differential ex-  
tinction among fossil taxa. *Proceedings of the National Academy of Sciences* 111:16419–16424.
- Wagner, P. J., and J. D. Marcot. 2013. Modelling distributions of fossil sampling rates over time,  
819 space and taxa: assessment and implications for macroevolutionary studies. *Methods in Ecol-  
ogy and Evolution* 4:703–713.
- Wang, S. C. 2003. On the continuity of background and mass extinction. *Paleobiology* 29:455–467.
- 822 Wang, S. C., and C. R. Marshall. 2004. Improved confidence intervals for estimating the position  
of a mass extinction boundary. *Paleobiology* 30:5–18.
- Williams, C., C. H. C. Brunton, and S. J. Carlson. 2007. *Treatise on invertebrate paleontology. Part*  
825 *H, Brachiopoda*. Geological Society of America, Boulder, Colorado.
